# Supplementary material for: Energy Budgeting and Carbon Footprints Estimation of Fodder Maize Varieties Sown under Different Nutrient Management Practices in Indo-Gangetic Plains of India
Source: MDPI journal article supplement (doi:10.3390/agronomy13040981), 2023-03-26
Supplement: s1 [file s1]

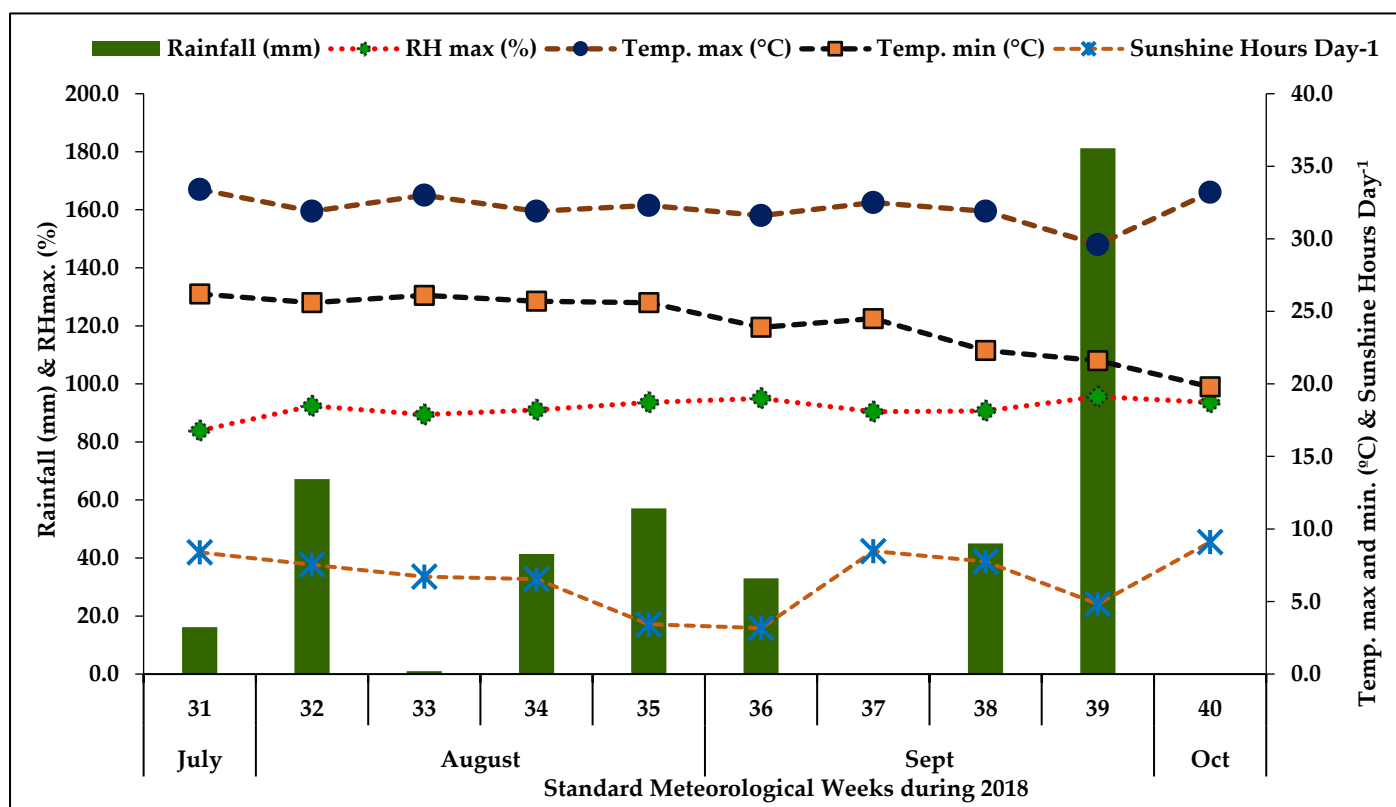

**Figure S1.** Mean weekly meteorological data during kharif season of 2018.

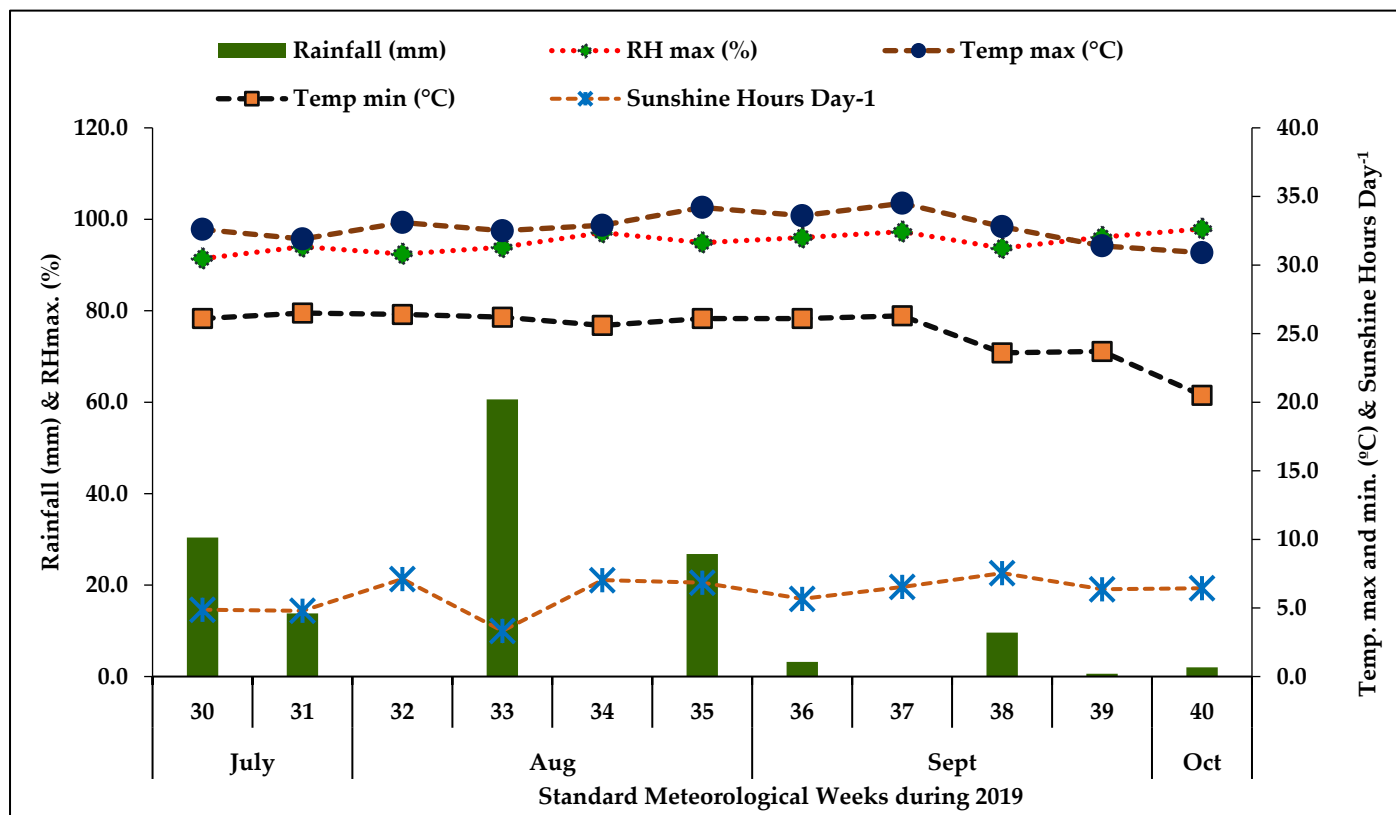

Figure S2. Mean weekly meteorological data during kharif season of 2019.

**Table S1.** Chemical characteristics of FYM used in the experimentation.

| Parameters                              | 2018-19      | 2019-20       |
|-----------------------------------------|--------------|---------------|
| pH <sub>1:5</sub>                       | 8.25 ± 0.01  | 8.31 ± 0.01   |
| EC <sub>1:5</sub> (dS m <sup>-1</sup> ) | 3.40 ± 0.08  | 3.36 ± 0.12   |
| Oxidizable OC (%)                       | 11.25 ± 0.09 | 11.72 ± 0.07  |
| Total carbon (%)                        | 20.78 ± 0.28 | 20.85 ± 0.19  |
| Total N (%)                             | 0.62 ± 0.07  | 0.69 ± 0.08   |
| Total P (%)                             | 0.45 ± 0.01  | 0.46 ± 0.02   |
| Total K (%)                             | 0.82 ± 0.02  | 0.85 ± 0.03   |
| Ca (g kg <sup>-1</sup> )                | 27.35 ± 0.15 | 27.57 ± 0.13  |
| Mg (g kg <sup>-1</sup> )                | 11.79 ± 0.34 | 12.02 ± 0.42  |
| Fe (g kg <sup>-1</sup> )                | 3.21 ± 0.02  | 3.28 ± 0.03   |
| Zn (mg kg <sup>-1</sup> )               | 205.3 ± 8.34 | 221.4 ± 10.24 |
| Mn (mg kg <sup>-1</sup> )               | 323.0 ± 6.05 | 332.7 ± 6.38  |
| Cu (mg kg <sup>-1</sup> )               | 52.6 ± 1.35  | 57.3 ± 1.51   |

**Table S2.** Chemical and microbial characteristics of panchagavya used in the experimentation.

| Parameters                                                      | 2018-19     | 2019-20     |
|-----------------------------------------------------------------|-------------|-------------|
| <b>A) Physico-chemical properties</b>                           |             |             |
| EC <sub>1:5</sub> (dS m <sup>-1</sup> )                         | 6.14 ± 0.06 | 6.21 ± 0.05 |
| pH <sub>1:5</sub>                                               | 4.35 ± 0.04 | 4.28 ± 0.05 |
| Total N (%)                                                     | 0.64 ± 0.01 | 0.65 ± 0.02 |
| Total P (%)                                                     | 0.10 ± 0.01 | 0.10 ± 0.01 |
| Total K (%)                                                     | 0.47 ± 0.03 | 0.46 ± 0.02 |
| Ca (mg kg <sup>-1</sup> )                                       | 121 ± 4.85  | 127 ± 5.95  |
| Mg (mg kg <sup>-1</sup> )                                       | 42 ± 2.54   | 45 ± 2.35   |
| Fe (mg kg <sup>-1</sup> )                                       | 8.75 ± 0.12 | 8.83 ± 0.10 |
| Zn (mg kg <sup>-1</sup> )                                       | 1.05 ± 0.02 | 1.04 ± 0.01 |
| Mn (mg kg <sup>-1</sup> )                                       | 1.48 ± 0.02 | 1.52 ± 0.04 |
| Cu (mg kg <sup>-1</sup> )                                       | 0.62 ± 0.01 | 0.59 ± 0.01 |
| <b>B) Microbial properties</b>                                  |             |             |
| Total Bacteria<br>(×10 <sup>5</sup> CFU ml <sup>-1</sup> )      | 38.2 ± 1.45 | 40.6 ± 2.18 |
| Total Fungi<br>(×10 <sup>3</sup> CFU ml <sup>-1</sup> )         | 25.6 ± 1.52 | 26.8 ± 1.05 |
| Total Actinomycetes<br>(×10 <sup>2</sup> CFU ml <sup>-1</sup> ) | 18.8 ± 1.12 | 19.0 ± 1.39 |
| Azotobacter<br>(×10 <sup>2</sup> CFU ml <sup>-1</sup> )         | 7.0 ± 0.65  | 7.4 ± 0.42  |
| P solubilizers<br>(×10 <sup>2</sup> CFU ml <sup>-1</sup> )      | 8.2 ± 0.38  | 8.0 ± 0.56  |
